# Supplementary material for: Iron–nitrogen co-doped hollow carbon sphere with mesoporous structure for enhanced oxygen reduction reaction
Source: Royal Society of Chemistry journal article supplement (doi:10.1039/c5ra20738j), 2015-01-01
Supplement: c5ra20738j1.pdf [file c5ra20738j1.pdf]

## Supporting information

### Iron-nitrogen co-doped hollow carbon sphere with mesoporous structure for enhanced oxygen reduction reaction

Qingwen Gao, Qingxue Lai, Yanyu Liang\*

Nanjing University of Aeronautics and Astronautics, Nanjing, 210016, P. R. China

Corresponding author, E-mail: liangyy403@126.com

| Sample        | BET surface area(m <sup>2</sup> g <sup>-1</sup> ) | Total pore volume(ccg <sup>-1</sup> ) |
|---------------|---------------------------------------------------|---------------------------------------|
| Fe@FeN-CS     | 25.736                                            | 0.1232                                |
| Fe@FeN-CS-900 | 54.382                                            | 0.1935                                |
| FeN-HCS       | 103.735                                           | 0.5266                                |

**Table S1.** The BET surface area and total pore volume of Fe@FeN-CS, Fe@FeN-CS-900 and FeN-HCS

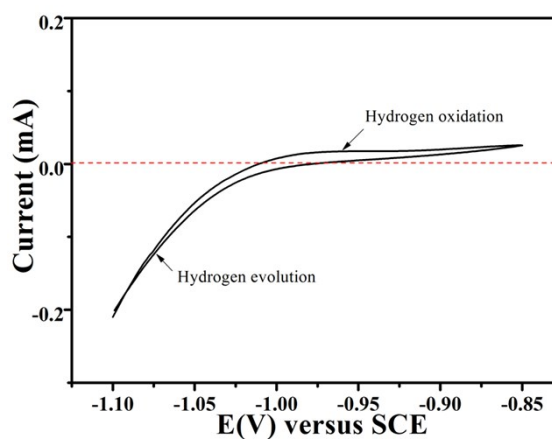

**Figure S1.** Calibration of SCE to RHE

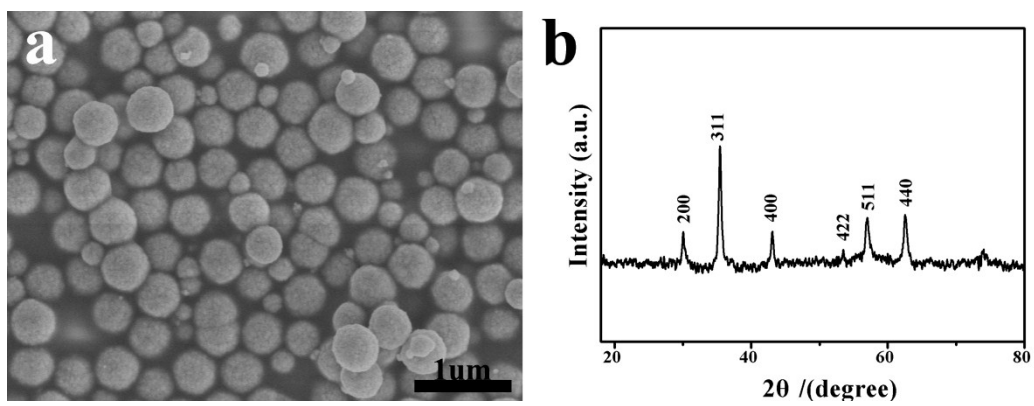

Figure S2. (a) SEM image and (b) XRD pattern of  $\text{Fe}_3\text{O}_4$

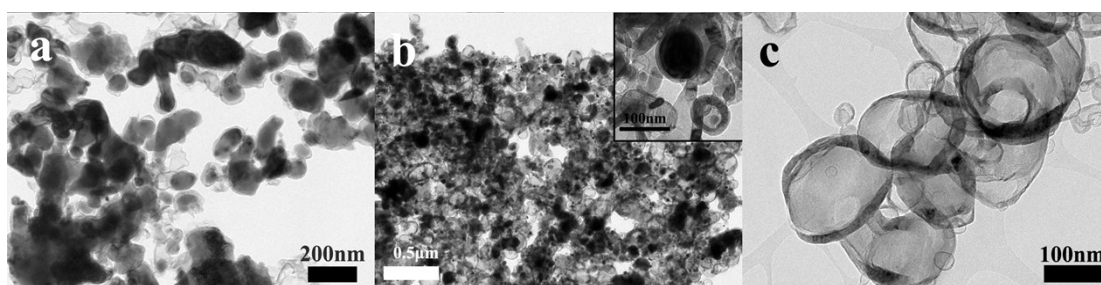

Figure S3. TEM images of (a) Fe@FeN-CS, (b) Fe@FeN-CS-900 and (c) FeN-HCS

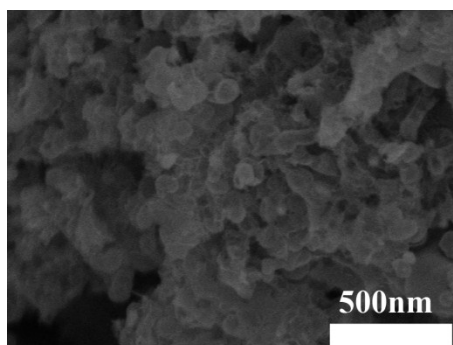

Figure S4. SEM image of Fe/C prepared from citric acid

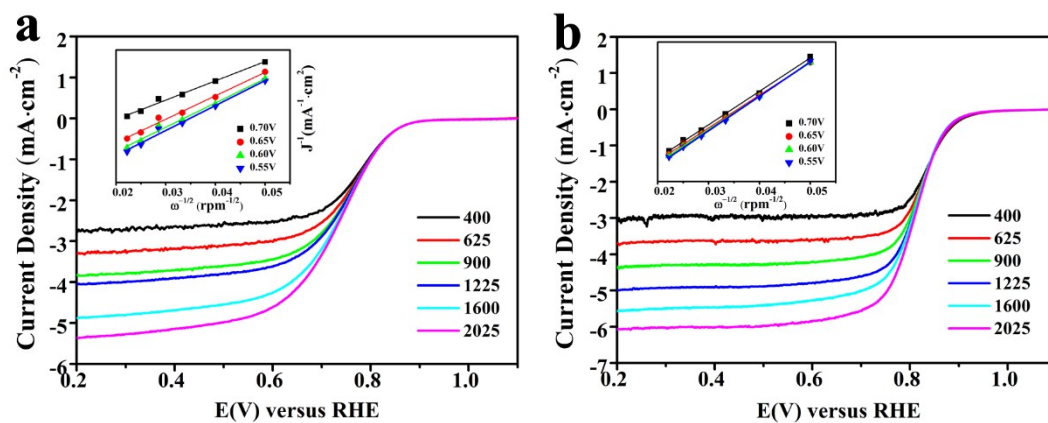

Figure S5. LSV with different rotation speeds for (a) Fe@FeN-CS and (b) Pt/C catalysts and the Koutecky–Levich plots at the different potential (insert)

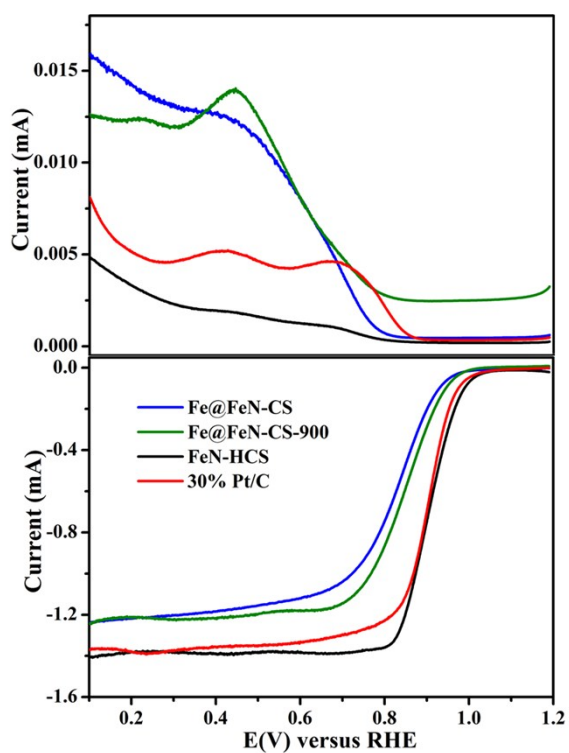

Figure S6. RRDE Polarization plots measured in O<sub>2</sub>-saturated 0.1 M KOH at with rotation at 1600 rpm, ring current (top) and disk current (bottom)

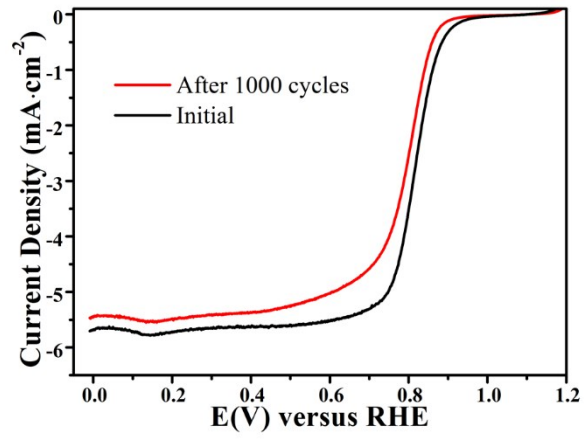

Figure S7. ORR polarization plots of Pt/C catalyst before and after accelerated degradation tests (ADT)
